# Supplementary material for: Drosophila Nanos acts as a molecular clamp that modulates the RNA-binding and repression activities of Pumilio
Source: eLife. 2016 Aug 2;5:e17096. doi: 10.7554/eLife.17096 (PMC4995099; doi:10.7554/eLife.17096)
Supplement: Figure 1—figure supplement 1—source data 1. — Quantitation of the Northern blot in Figure 1—figure supplement 1 was performed and the average ratio of Renilla luciferase mRNA to 7SL RNA internal control (Rn/7SL) was calculated to normalize expression values (Normed, n = 3). Standard Error of the Mean (SEM) is reported for each measurment. The p-values (p-val) resulting from two-tailed t-tests between each measurement and the indicated control are represented in bold (significant) or italics (not significant). DOI: http://dx.doi.org/10.7554/eLife.17096.006 [file elife-17096-fig1-figsupp1-data1.xlsx]

## Sheet: Sheet1
Figure 1 - figure supplement 1 source data. Values and statistical analysis of Northern blot of luciferase reporter mRNAs. Quantitation of the Northern blot in Figure 1-figure supplement 1 was performed and the average ratio of Renilla luciferase mRNA to 7SL RNA internal control (Rn/7SL) was calculated to normalize expression values (Normed, n = 3). Standard Error of the Mean (SEM) is reported fo…
Figure 1-figure supplement 1
UTR	Protein	avg Rn/7SL	Normed	SEM	Halo p-val
WT	Halo	0.873657	100	10.3249
WT	NZC	0.451775	51.7108	3.47293	0.0114
mt1,2	Halo	0.860572	98.5023	9.93603	0.9217
mt1,2	NZC	1.01571	116.26	10.01	0.3201
