# Supplementary material for: Drosophila Nanos acts as a molecular clamp that modulates the RNA-binding and repression activities of Pumilio
Source: eLife. 2016 Aug 2;5:e17096. doi: 10.7554/eLife.17096 (PMC4995099; doi:10.7554/eLife.17096)
Supplement: Figure 1—source data 1. — The average value of the relative response ratio of Renilla to Firefly luciferase activities (Rn/FF), average percent repression values (%Repress), and Standard Errors of the Mean (SEM) are listed for each condition in the experiments (from four technical replicates, n = 4). The p-values (p-val) resulting from two-tailed t-tests between each measurement and the indicated control are represented in bold (significant) or italics (not significant). Experimental values derived from the same experiment are outlined in boxes. DOI: http://dx.doi.org/10.7554/eLife.17096.004 [file elife-17096-fig1-data1.xlsx]

## Sheet: Sheet1
Figure 1 - Source Data. Values and statistical analysis of luciferase reporter assays. The average value of the relative response ratio of Renilla to Firefly luciferase activities (Rn/FF), average percent repression values (%Repress), and Standard Errors of the Mean (SEM) are listed for each condition in the experiments (from 4 technical replicates, n = 4). The p-values (p-val) resulting from two…
Figure 1C
UTR	Protein	avg Rn/FF	%Repress	SEM	Halo p-val
WT	Halo	0.207	0	0.853131
WT	NZC	0.052	74.6	0.511008	<0.0001
mt1	Halo	0.339	0	0.921686
mt1	NZC	0.15	55.6	0.616417	<0.0001
mt2	Halo	0.221	0	0.434174
mt2	NZC	0.082	62.8	0.313506	<0.0001
mt1,2	Halo	0.308	0	1.16975
mt1,2	NZC	0.355	-15.2	0.862729	<0.0001
Figure 1D
UTR	Protein	avg Rn/FF	%Repress	SEM	Halo p-val	NZC p-val
WT	Halo	0.15764	2.89e-15	2.97469		<0.0001
WT	NZC	0.033629	78.667	0.708439	<0.0001
WT	C319Y	0.153812	2.42825	1.50755	0.4989	<0.0001
WT	C354Y	0.156489	0.73032	1.87552	0.8488	<0.0001
WT	NZ	0.131774	16.4083	2.02847	0.0039	<0.0001
WT	ZC	0.089327	43.3346	1.16979	<0.0001	<0.0001
WT	Halo	0.164899	-1.1e-14	0.916531		<0.0001
WT	NZC	0.033756	79.529	0.4984	<0.0001
WT	N	0.163106	1.08723	2.12139	0.6509	<0.0001
WT	Z	0.16202	1.74592	2.43635	0.5379	<0.0001
WT	C	0.162449	1.48572	4.797	0.7691	<0.0001
