# Supplementary material for: Drosophila Nanos acts as a molecular clamp that modulates the RNA-binding and repression activities of Pumilio
Source: eLife. 2016 Aug 2;5:e17096. doi: 10.7554/eLife.17096 (PMC4995099; doi:10.7554/eLife.17096)
Supplement: Figure 4—source data 1. — The average value of the relative response ratio of Renilla to Firefly luciferase activities (Rn/FF), average percent repression values (%Repress), and Standard Errors of the Mean (SEM) are listed for each condition in the experiments (from four technical replicates, n = 4). The p-values (p-val) resulting from two-tailed t-tests between each measurement and the indicated control are represented in bold (significant) or italics (not significant). Experimental values derived from the same experiment are outlined in boxes. DOI: http://dx.doi.org/10.7554/eLife.17096.015 [file elife-17096-fig4-data1.xlsx]

## Sheet: Sheet1
Figure 4 - Source Data. Values and statistical analysis of luciferase reporter assays. The average value of the relative response ratio of Renilla to Firefly luciferase activities (Rn/FF), average percent repression values (%Repress), and Standard Errors of the Mean (SEM) are listed for each condition in the experiments (from 4 technical replicates, n = 4). The p-values (p-val) resulting from two…
Figure 4C
UTR	Protein	avg Rn/FF	%Repress	SEM	Halo p-val	NZC p-val
WT	Halo	0.174896	-2.8e-15	0.613741		<0.0001
WT	NZC	0.040569	76.8039	0.141464	<0.0001
WT	NZ	0.150712	13.8271	0.472583	<0.0001	<0.0001
WT	Δ376-382	0.12842	26.5735	0.453656	<0.0001	<0.0001
WT	Δ383-393	0.099677	43.0075	0.37447	<0.0001	<0.0001
WT	Δ394-401	0.037489	78.5647	0.145481	<0.0001	0.0001
Figure 4D
UTR	Protein	avg Rn/FF	%Repress	SEM	Halo p-val	NZC p-val
WT	Halo	0.655	-2.8e-15	0.992		<0.0001
WT	NZC	0.198	69.7	0.597	<0.0001
WT	Δ376-382	0.627	4.3	2.487	0.1594	<0.0001
WT	I376A	0.353	46.2	0.806	<0.0001	<0.0001
WT	M378A	0.465	29	0.772	<0.0001	<0.0001
WT	I382A	0.261	60.2	0.58	<0.0001	0.0001
