# Supplementary material for: Drosophila Nanos acts as a molecular clamp that modulates the RNA-binding and repression activities of Pumilio
Source: eLife. 2016 Aug 2;5:e17096. doi: 10.7554/eLife.17096 (PMC4995099; doi:10.7554/eLife.17096)
Supplement: Figure 5—source data 1. — The average value of the relative response ratio of Renilla to Firefly luciferase activities (Rn/FF), average percent repression values (%Repress), and Standard Errors of the Mean (SEM) are listed for each condition in the experiments (from four technical replicates, n = 4). The p-values (p-val) resulting from two-tailed t-tests between each measurement and the indicated control are represented in bold (significant) or italics (not significant). Experimental values derived from the same experiment are outlined in boxes. DOI: http://dx.doi.org/10.7554/eLife.17096.017 [file elife-17096-fig5-data1.xlsx]

## Sheet: Sheet1
Figure 5 - Source Data. Values and statistical analysis of luciferase reporter assays. The average value of the relative response ratio of Renilla to Firefly luciferase activities (Rn/FF), average percent repression values (%Repress), and Standard Errors of the Mean (SEM) are listed for each condition in the experiments (from 4 technical replicates, n = 4). The p-values (p-val) resulting from two…
Figure 5C
UTR	Protein	avg Rn/FF	%Repress	SEM	Halo p-val	NZC p-val
WT	Halo	0.125009	-1.1e-14	2.06832		<0.0001
WT	NZC	0.031187	75.0524	0.316764	<0.0001
WT	F321A	0.124453	0.444232	2.26888	0.9006	<0.0001
WT	N325A	0.0454	63.6828	0.66238	<0.0001	<0.0001
WT	Y352A	0.072256	42.1993	1.01132	<0.0001	<0.0001
WT	T366A	0.123578	1.14458	1.1143	0.6561	<0.0001
WT	K368Q	0.084394	32.4897	1.21235	<0.0001	<0.0001
WT	Y369A	0.110984	11.2191	1.97663	0.0078	<0.0001
Figure 5F
UTR	Protein	avg Rn/FF	%Repress	SEM	Halo p-val
WT	Halo	0.247443	8.22e-15	2.0615
WT	NZC	0.12276	50.3883	0.737742	<0.0001
-1C	Halo	0.333634	-5.6e-15	2.63591
-1C	NZC	0.39739	-19.1098	2.86921	0.0027
-2C	Halo	0.378385	-5.3e-15	2.0291
-2C	NZC	0.396716	-4.84472	1.88753	0.1340
