# Supplementary material for: Drosophila Nanos acts as a molecular clamp that modulates the RNA-binding and repression activities of Pumilio
Source: eLife. 2016 Aug 2;5:e17096. doi: 10.7554/eLife.17096 (PMC4995099; doi:10.7554/eLife.17096)
Supplement: Figure 7—source data 1. — Gene ontology enrichment results for Pum targets from Drosophila adults and embryos that contain SEQRS-derived Pum motif, Nos-Pum motif, or both motifs. (A) Target gene lists used in gene ontology analysis. (B) Gene ontology enrichment analysis of target mRNAs from adults that contain the Nos-Pum motif. (C) Gene ontology enrichment analysis of target mRNAs from adults that contain the Pum motif. (D) Gene ontology enrichment analysis of target mRNAs from adults that contain the Nos-Pum and Pum motif. No categories were significantly enriched. (E) Gene ontology enrichment analysis of target mRNAs from embryos that contain the Nos-Pum motif. (F) Gene ontology enrichment analysis of target mRNAs from embryos that contain the Pum motif. No categories were significantly enriched. (G) Gene ontology enrichment analysis of target mRNAs from embryos that contain both the Nos-Pum and Pum motif. No categories were significantly enriched. DOI: http://dx.doi.org/10.7554/eLife.17096.025 [file elife-17096-fig7-data1.xlsx]

## Sheet: A) Target Gene List
Figure 7 - source data 2. Related to Figure 7E. Target Gene Lists used in Gene Ontology Analysis
Adult: Nos-Pum motif	Adult: Pum motif	Adult: Both motifs	Embryo: Nos-Pum motif	Embryo: Pum motif	Embryo: Both motifs
FBgn0028583	FBgn0028583	FBgn0030817	FBgn0011761	FBgn0030817	FBgn0030817
FBgn0030481	FBgn0015568	FBgn0038256	FBgn0029733	FBgn0038256	FBgn0038256
FBgn0011704	FBgn0013750	FBgn0030932	FBgn0033979	FBgn0030932	FBgn0030932
FBgn0015568	FBgn0031534	FBgn0033236	FBgn0003015	FBgn0033236	FBgn0031126
FBgn0013750	FBgn0038099	FBgn0032026	FBgn0035641	FBgn0032026	FBgn0029943
FBgn0035266	FBgn0040366	FBgn0040928	FBgn0030817	FBgn0040928	FBgn0031719
FBgn0036144	FBgn0027375	FBgn0022981	FBgn0029860	FBgn0022981	FBgn0036749
FBgn0032521	FBgn0032214	FBgn0030608	FBgn0038256	FBgn0030608	FBgn0031491
FBgn0030679	FBgn0001977	FBgn0031126	FBgn0032262	FBgn0031126	FBgn0004889
FBgn0011705	FBgn0038460	FBgn0030481	FBgn0024732	FBgn0030481	FBgn0034808
FBgn0039417	FBgn0001941	FBgn0030803	FBgn0030932	FBgn0030803
FBgn0037632	FBgn0011555	FBgn0000251	FBgn0039251	FBgn0000251
FBgn0028526	FBgn0000533	FBgn0030178	FBgn0000615	FBgn0030178
FBgn0031534	FBgn0033871	FBgn0038251	FBgn0033236	FBgn0038251
FBgn0038099	FBgn0037093	FBgn0028408	FBgn0030740	FBgn0028408
FBgn0040366	FBgn0000463	FBgn0029943	FBgn0034021	FBgn0029943
FBgn0026252	FBgn0030447	FBgn0033584	FBgn0002673	FBgn0033584
FBgn0032078	FBgn0035806	FBgn0020018	FBgn0011705	FBgn0020018
FBgn0002962	FBgn0030003	FBgn0031719	FBgn0003114	FBgn0031719
FBgn0027375	FBgn0028397	FBgn0004882	FBgn0033757	FBgn0004882
FBgn0030109	FBgn0010315	FBgn0036749	FBgn0029685	FBgn0036749
FBgn0004856	FBgn0031090	FBgn0020545	FBgn0033762	FBgn0020545
FBgn0030608	FBgn0030673	FBgn0036837	FBgn0029879	FBgn0036837
FBgn0033889	FBgn0034794	FBgn0031457	FBgn0032026	FBgn0031457
FBgn0031988	FBgn0031069	FBgn0036769	FBgn0040928	FBgn0036769
FBgn0034025	FBgn0030931	FBgn0031491	FBgn0037879	FBgn0031491
FBgn0037635	FBgn0031491	FBgn0000077	FBgn0036887	FBgn0000077
FBgn0037555	FBgn0031183	FBgn0036536	FBgn0033631	FBgn0036536
FBgn0032214	FBgn0036020	FBgn0039153	FBgn0038627	FBgn0039153
FBgn0001977	FBgn0026379	FBgn0004889	FBgn0039625	FBgn0004889
FBgn0038460	FBgn0030996	FBgn0029756	FBgn0037617	FBgn0029756
FBgn0028662	FBgn0034031	FBgn0032449	FBgn0030608	FBgn0032449
FBgn0001941	FBgn0016701	FBgn0034808	FBgn0031126	FBgn0034808
FBgn0033737	FBgn0038755	FBgn0038738	FBgn0030607	FBgn0038738
FBgn0011555	FBgn0040827	FBgn0040347	FBgn0030481	FBgn0040347
FBgn0000533	FBgn0028665		FBgn0038828
FBgn0033871	FBgn0033473		FBgn0032014
FBgn0038039	FBgn0011573		FBgn0030803
FBgn0033356	FBgn0024994		FBgn0002901
FBgn0030418	FBgn0001330		FBgn0000251
FBgn0037093	FBgn0013749		FBgn0026619
FBgn0011300	FBgn0030420		FBgn0028408
FBgn0000463	FBgn0033846		FBgn0039942
FBgn0030703	FBgn0003716		FBgn0013773
FBgn0031738	FBgn0010651		FBgn0029943
FBgn0030447	FBgn0004390		FBgn0038316
FBgn0039532	FBgn0037110		FBgn0040375
FBgn0030797	FBgn0030932		FBgn0033584
FBgn0035806	FBgn0002778		FBgn0039006
FBgn0030003	FBgn0031126		FBgn0000808
FBgn0002638	FBgn0036240		FBgn0039944
FBgn0040239	FBgn0030864		FBgn0031719
FBgn0031818	FBgn0005617		FBgn0032135
FBgn0030794	FBgn0030970		FBgn0004882
FBgn0028397	FBgn0032688		FBgn0030963
FBgn0020622	FBgn0036842		FBgn0033875
FBgn0010315	FBgn0046301		FBgn0036749
FBgn0031090	FBgn0037473		FBgn0020545
FBgn0000384	FBgn0038966		FBgn0036837
FBgn0029929	FBgn0038584		FBgn0031457
FBgn0000447	FBgn0032231		FBgn0004872
FBgn0000182	FBgn0041712		FBgn0036769
FBgn0010317	FBgn0035889		FBgn0036332
FBgn0030673	FBgn0033916		FBgn0031491
FBgn0034794	FBgn0003742		FBgn0000077
FBgn0015324	FBgn0038256		FBgn0003495
FBgn0030960	FBgn0030687		FBgn0036536
FBgn0031069	FBgn0038065		FBgn0000158
FBgn0030931	FBgn0030790		FBgn0034141
FBgn0002283	FBgn0039741		FBgn0004889
FBgn0004888	FBgn0037610		FBgn0033773
FBgn0003015	FBgn0035281		FBgn0037540
FBgn0000581	FBgn0026573		FBgn0029756
FBgn0031491	FBgn0034933		FBgn0038292
FBgn0031836	FBgn0023388		FBgn0002962
FBgn0035848	FBgn0031359		FBgn0003023
FBgn0019948	FBgn0036004		FBgn0015321
FBgn0036449	FBgn0030744		FBgn0039972
FBgn0031637	FBgn0029894		FBgn0040309
FBgn0034797	FBgn0029822		FBgn0037615
FBgn0003042	FBgn0033749		FBgn0039640
FBgn0031183	FBgn0041781		FBgn0034808
FBgn0036020	FBgn0031657		FBgn0004419
FBgn0026379	FBgn0025455		FBgn0039958
FBgn0037655	FBgn0034758		FBgn0016070
FBgn0032987	FBgn0034186		FBgn0037614
FBgn0015828	FBgn0031681		FBgn0003480
FBgn0033259	FBgn0020304		FBgn0023216
FBgn0028507	FBgn0032259		FBgn0004649
FBgn0002566	FBgn0029943		FBgn0044823
FBgn0031054	FBgn0021944		FBgn0034187
FBgn0031117	FBgn0038136		FBgn0040347
FBgn0035145	FBgn0016694		FBgn0010590
FBgn0030996	FBgn0001180		FBgn0031896
FBgn0032450	FBgn0042627		FBgn0005777
FBgn0034031	FBgn0037715		FBgn0026404
FBgn0001987	FBgn0025684
FBgn0016701	FBgn0037737
FBgn0038755	FBgn0030724
FBgn0031769	FBgn0037134
FBgn0014877	FBgn0033075
FBgn0000250	FBgn0035617
FBgn0038197	FBgn0015558
FBgn0040827	FBgn0020386
FBgn0028665	FBgn0040297
FBgn0033473	FBgn0000014
FBgn0031038	FBgn0034313
FBgn0037606	FBgn0000567
FBgn0011573	FBgn0033978
FBgn0024994	FBgn0000119
FBgn0032482	FBgn0030731
FBgn0011225	FBgn0004656
FBgn0001330	FBgn0036900
FBgn0038524	FBgn0000018
FBgn0013749	FBgn0037011
FBgn0032445	FBgn0035763
FBgn0032130	FBgn0033051
FBgn0005671	FBgn0035529
FBgn0032282	FBgn0028474
FBgn0030420	FBgn0026076
FBgn0031229	FBgn0033748
FBgn0030336	FBgn0011288
FBgn0003062	FBgn0020509
FBgn0033846	FBgn0031516
FBgn0003716	FBgn0000163
FBgn0037573
FBgn0027495
FBgn0038429
FBgn0032858
FBgn0000404
FBgn0031190
FBgn0000251
FBgn0010651
FBgn0002121
FBgn0004390
FBgn0034763
FBgn0032026
FBgn0005278
FBgn0037110
FBgn0037755
FBgn0030932
FBgn0002778
FBgn0039223
FBgn0000405
FBgn0031356
FBgn0032750
FBgn0029962
FBgn0027615
FBgn0034925
FBgn0011672
FBgn0036998
FBgn0029849
FBgn0031126
FBgn0035424
FBgn0030582
FBgn0036240
FBgn0030864
FBgn0030008
FBgn0030484
FBgn0029944
FBgn0011837
FBgn0039602
FBgn0031392
FBgn0035696
FBgn0024889
FBgn0037760
FBgn0031834
FBgn0004837
FBgn0031378
FBgn0033236
FBgn0023517
FBgn0005617
FBgn0030970
FBgn0032688
FBgn0023530
FBgn0031036
FBgn0023528
FBgn0036842
FBgn0046301
FBgn0037473
FBgn0038966
FBgn0038584
FBgn0032231
FBgn0037720
FBgn0034946
FBgn0003162
FBgn0002593
FBgn0026250
FBgn0039969
FBgn0000719
FBgn0014010
FBgn0041712
FBgn0000077
FBgn0035889
FBgn0034491
FBgn0033916
FBgn0042641
FBgn0003742
FBgn0037922
FBgn0037636
FBgn0004403
FBgn0039740
FBgn0036063
FBgn0031224
FBgn0029878
FBgn0036980
FBgn0004462
FBgn0015509
FBgn0039562
FBgn0039792
FBgn0030240
FBgn0038256
FBgn0037838
FBgn0030687
FBgn0016984
FBgn0039207
FBgn0038065
FBgn0027660
FBgn0039634
FBgn0030790
FBgn0032725
FBgn0036614
FBgn0039741
FBgn0036007
FBgn0030963
FBgn0028664
FBgn0038196
FBgn0037610
FBgn0010415
FBgn0035281
FBgn0033808
FBgn0039735
FBgn0026573
FBgn0033639
FBgn0023097
FBgn0000166
FBgn0035978
FBgn0037027
FBgn0004914
FBgn0036887
FBgn0034933
FBgn0023388
FBgn0039858
FBgn0031359
FBgn0002413
FBgn0026375
FBgn0030056
FBgn0036004
FBgn0030744
FBgn0029894
FBgn0003041
FBgn0029822
FBgn0034543
FBgn0035890
FBgn0036199
FBgn0039633
FBgn0003302
FBgn0023083
FBgn0039868
FBgn0032979
FBgn0000283
FBgn0033749
FBgn0041781
FBgn0037835
FBgn0037070
FBgn0035169
FBgn0003525
FBgn0016070
FBgn0031657
FBgn0011205
FBgn0035533
FBgn0033784
FBgn0032234
FBgn0025455
FBgn0031682
FBgn0030990
FBgn0025626
FBgn0034758
FBgn0030343
FBgn0004648
FBgn0038608
FBgn0040397
FBgn0034186
FBgn0031681
FBgn0020304
FBgn0004838
FBgn0023213
FBgn0004598
FBgn0016126
FBgn0032259
FBgn0029943
FBgn0022153
FBgn0021944
FBgn0024975
FBgn0015756
FBgn0032191
FBgn0038136
FBgn0016694
FBgn0030055
FBgn0025681
FBgn0001180
FBgn0022764
FBgn0042627
FBgn0038877
FBgn0037715
FBgn0025684
FBgn0015791
FBgn0036337
FBgn0027518
FBgn0003117
FBgn0034585
FBgn0040237
FBgn0037737
FBgn0027507
FBgn0014454
FBgn0030366
FBgn0030724
FBgn0037134
FBgn0021872
FBgn0030077
FBgn0033075
FBgn0035617
FBgn0021818
FBgn0036534
FBgn0032051
FBgn0003206
FBgn0015558
FBgn0020386
FBgn0026196
FBgn0040297
FBgn0000014
FBgn0020440
FBgn0033166
FBgn0034313
FBgn0032702
FBgn0000567
FBgn0039135
FBgn0034442
FBgn0002643
FBgn0026753
FBgn0039589
FBgn0027594
FBgn0033978
FBgn0028406
FBgn0030294
FBgn0031061
FBgn0010303
FBgn0000032
FBgn0033497
FBgn0000119
FBgn0028473
FBgn0033984
FBgn0030731
FBgn0037098
FBgn0004656
FBgn0039875
FBgn0035107
FBgn0017418
FBgn0036900
FBgn0000018
FBgn0030973
FBgn0038369
FBgn0035087
FBgn0037011
FBgn0025836
FBgn0035763
FBgn0003748
FBgn0004868
FBgn0033005
FBgn0033051
FBgn0036032
FBgn0035529
FBgn0028953
FBgn0028474
FBgn0032475
FBgn0015520
FBgn0026076
FBgn0033748
FBgn0032587
FBgn0030486
FBgn0029905
FBgn0011288
FBgn0030028
FBgn0030890
FBgn0011761
FBgn0003301
FBgn0020509
FBgn0031377
FBgn0005694
FBgn0031516
FBgn0032236
FBgn0046296
FBgn0000163
FBgn0002872
FBgn0042630

## Sheet: B) Adult; Nos-Pum motif
Category	Term	Count	%	PValue	Genes	List Total	Pop Hits	Pop Total	Fold Enrichment	Bonferroni	Benjamini	FDR
GOTERM_BP_FAT	GO:0007167~enzyme linked receptor protein signaling pathway	17	4.3038	4.0902e-06	FBGN0026252, FBGN0004390, FBGN0020440, FBGN0003716, FBGN0038755, FBGN0004598, FBGN0020386, FBGN0011300, FBGN0011573, FBGN0021818, FBGN0001180, FBGN0020622, FBGN0002121, FBGN0000719, FBGN0038197, FBGN0003117, FBGN0026379	231	145	7937	4.02833	0.00619783	0.00619783	0.00680669
GOTERM_BP_FAT	GO:0008104~protein localization	27	6.83544	6.14364e-05	FBGN0013749, FBGN0020440, FBGN0033984, FBGN0031534, FBGN0000405, FBGN0011225, FBGN0000119, FBGN0003041, FBGN0004868, FBGN0033737, FBGN0031090, FBGN0002121, FBGN0000250, FBGN0038065, FBGN0026252, FBGN0002566, FBGN0024889, FBGN0023388, FBGN0003015, FBGN0015791, FBGN0014877, FBGN0027615, FBGN0013750, FBGN0029943, FBGN0016701, FBGN0014010, FBGN0000163	231	392	7937	2.36658	0.0891583	0.0456197	0.102193
GOTERM_BP_FAT	GO:0007169~transmembrane receptor protein tyrosine kinase signaling pathway	13	3.29114	6.87614e-05	FBGN0004390, FBGN0026252, FBGN0020440, FBGN0038755, FBGN0020386, FBGN0004598, FBGN0011573, FBGN0021818, FBGN0001180, FBGN0020622, FBGN0000719, FBGN0038197, FBGN0026379	231	109	7937	4.0979	0.0992441	0.0342404	0.114371
GOTERM_BP_FAT	GO:0051301~cell division	18	4.55696	8.84979e-05	FBGN0003716, FBGN0000404, FBGN0000405, FBGN0011225, FBGN0003525, FBGN0011205, FBGN0010315, FBGN0011573, FBGN0037473, FBGN0003041, FBGN0004837, FBGN0000463, FBGN0031090, FBGN0013750, FBGN0002638, FBGN0000163, FBGN0002962, FBGN0002643	231	205	7937	3.01691	0.125867	0.0330714	0.147176
GOTERM_BP_FAT	GO:0007369~gastrulation	10	2.53165	0.000213949	FBGN0000014, FBGN0033075, FBGN0000384, FBGN0003525, FBGN0000077, FBGN0000251, FBGN0000719, FBGN0003041, FBGN0000163, FBGN0002643	231	72	7937	4.77213	0.277644	0.062977	0.355458
GOTERM_BP_FAT	GO:0007389~pattern specification process	29	7.34177	0.000290634	FBGN0003042, FBGN0003162, FBGN0003716, FBGN0027594, FBGN0000463, FBGN0042641, FBGN0010303, FBGN0038524, FBGN0002121, FBGN0000250, FBGN0000533, FBGN0000251, FBGN0000719, FBGN0001987, FBGN0016984, FBGN0004390, FBGN0026252, FBGN0010651, FBGN0029905, FBGN0003015, FBGN0001180, FBGN0021818, FBGN0000014, FBGN0004837, FBGN0004838, FBGN0000166, FBGN0003117, FBGN0000163, FBGN0002962	231	480	7937	2.07587	0.35714	0.0709921	0.482575
GOTERM_BP_FAT	GO:0008361~regulation of cell size	10	2.53165	0.000292807	FBGN0020622, FBGN0039532, FBGN0002413, FBGN0010303, FBGN0020386, FBGN0003301, FBGN0029944, FBGN0010315, FBGN0038197, FBGN0026379	231	75	7937	4.58124	0.35926	0.0616106	0.486175
GOTERM_BP_FAT	GO:0001709~cell fate determination	13	3.29114	0.000344593	FBGN0000014, FBGN0004837, FBGN0003716, FBGN0011225, FBGN0002121, FBGN0000077, FBGN0000163, FBGN0003117, FBGN0002643, FBGN0003015, FBGN0002962, FBGN0001180, FBGN0026379	231	129	7937	3.46257	0.407777	0.0633859	0.571928
GOTERM_BP_FAT	GO:0007444~imaginal disc development	26	6.58228	0.000346106	FBGN0003716, FBGN0011225, FBGN0027594, FBGN0011205, FBGN0011300, FBGN0004648, FBGN0000463, FBGN0042641, FBGN0002413, FBGN0010303, FBGN0002121, FBGN0000251, FBGN0001987, FBGN0002643, FBGN0032475, FBGN0026252, FBGN0004390, FBGN0010651, FBGN0029905, FBGN0003302, FBGN0021818, FBGN0004837, FBGN0000014, FBGN0004856, FBGN0029944, FBGN0030486	231	412	7937	2.16831	0.409138	0.0567874	0.574433
GOTERM_BP_FAT	GO:0032535~regulation of cellular component size	11	2.78481	0.000559134	FBGN0020622, FBGN0039532, FBGN0002413, FBGN0010303, FBGN0020386, FBGN0038369, FBGN0003301, FBGN0029944, FBGN0010315, FBGN0038197, FBGN0026379	231	99	7937	3.8177	0.572637	0.0814989	0.926452
GOTERM_BP_FAT	GO:0003002~regionalization	27	6.83544	0.000639577	FBGN0003042, FBGN0003716, FBGN0027594, FBGN0000463, FBGN0042641, FBGN0010303, FBGN0038524, FBGN0002121, FBGN0000250, FBGN0000533, FBGN0000719, FBGN0000251, FBGN0001987, FBGN0016984, FBGN0026252, FBGN0004390, FBGN0010651, FBGN0029905, FBGN0001180, FBGN0021818, FBGN0003015, FBGN0004837, FBGN0000014, FBGN0004838, FBGN0000166, FBGN0003117, FBGN0002962	231	454	7937	2.04339	0.621852	0.0846111	1.05908
GOTERM_BP_FAT	GO:0009798~axis specification	16	4.05063	0.000710748	FBGN0004390, FBGN0021818, FBGN0001180, FBGN0003015, FBGN0004838, FBGN0000463, FBGN0038524, FBGN0002121, FBGN0000166, FBGN0000250, FBGN0000533, FBGN0000719, FBGN0000251, FBGN0000163, FBGN0016984, FBGN0002962	231	201	7937	2.73507	0.660649	0.0861237	1.17627
GOTERM_BP_FAT	GO:0048729~tissue morphogenesis	18	4.55696	0.00080473	FBGN0026252, FBGN0003716, FBGN0039532, FBGN0000384, FBGN0011225, FBGN0038755, FBGN0003041, FBGN0000014, FBGN0000463, FBGN0002413, FBGN0010303, FBGN0027660, FBGN0002121, FBGN0029944, FBGN0000719, FBGN0000163, FBGN0003117, FBGN0002643	231	247	7937	2.50392	0.705855	0.089835	1.33083
GOTERM_BP_FAT	GO:0048598~embryonic morphogenesis	17	4.3038	0.000844396	FBGN0003716, FBGN0039532, FBGN0000384, FBGN0011225, FBGN0003525, FBGN0003041, FBGN0000014, FBGN0033075, FBGN0010303, FBGN0002121, FBGN0029944, FBGN0000077, FBGN0000719, FBGN0000251, FBGN0000163, FBGN0003117, FBGN0002643	231	226	7937	2.58455	0.723079	0.0876358	1.396
GOTERM_BP_FAT	GO:0007422~peripheral nervous system development	10	2.53165	0.000961731	FBGN0022764, FBGN0000014, FBGN0000463, FBGN0023083, FBGN0000404, FBGN0003525, FBGN0023097, FBGN0003041, FBGN0001987, FBGN0016984	231	88	7937	3.90447	0.768352	0.0928998	1.58853
GOTERM_BP_FAT	GO:0007242~intracellular signaling cascade	20	5.06329	0.000973265	FBGN0013749, FBGN0026252, FBGN0004390, FBGN0039532, FBGN0003301, FBGN0010315, FBGN0011573, FBGN0046296, FBGN0036980, FBGN0021818, FBGN0015791, FBGN0030028, FBGN0010303, FBGN0031090, FBGN0013750, FBGN0029944, FBGN0016701, FBGN0003206, FBGN0014010, FBGN0030486	231	297	7937	2.31376	0.772381	0.0883555	1.60744
GOTERM_BP_FAT	GO:0007264~small GTPase mediated signal transduction	11	2.78481	0.00118933	FBGN0013749, FBGN0004390, FBGN0039532, FBGN0031090, FBGN0013750, FBGN0003206, FBGN0016701, FBGN0014010, FBGN0036980, FBGN0021818, FBGN0015791	231	109	7937	3.46745	0.836159	0.100938	1.96098
GOTERM_BP_FAT	GO:0007498~mesoderm development	10	2.53165	0.00122394	FBGN0000014, FBGN0000463, FBGN0004914, FBGN0035533, FBGN0003525, FBGN0000077, FBGN0000719, FBGN0003041, FBGN0003117, FBGN0002643	231	91	7937	3.77575	0.844566	0.0982505	2.0175
GOTERM_BP_FAT	GO:0060429~epithelium development	17	4.3038	0.00127752	FBGN0026252, FBGN0023083, FBGN0003716, FBGN0039532, FBGN0000384, FBGN0011225, FBGN0038755, FBGN0000463, FBGN0002413, FBGN0010303, FBGN0027660, FBGN0002121, FBGN0029944, FBGN0000719, FBGN0000163, FBGN0003117, FBGN0001987	231	235	7937	2.48557	0.856736	0.0972113	2.10493
GOTERM_BP_FAT	GO:0009886~post-embryonic morphogenesis	22	5.56962	0.00134155	FBGN0004390, FBGN0026252, FBGN0003716, FBGN0011225, FBGN0035107, FBGN0011205, FBGN0011300, FBGN0003302, FBGN0004648, FBGN0021818, FBGN0000463, FBGN0000567, FBGN0002413, FBGN0042641, FBGN0010303, FBGN0002121, FBGN0029944, FBGN0029943, FBGN0001987, FBGN0016984, FBGN0002643, FBGN0026379	231	353	7937	2.14137	0.87004	0.0969942	2.20933
GOTERM_BP_FAT	GO:0045184~establishment of protein localization	19	4.81013	0.00153286	FBGN0013749, FBGN0026252, FBGN0033984, FBGN0031534, FBGN0002566, FBGN0000119, FBGN0024889, FBGN0003041, FBGN0015791, FBGN0004868, FBGN0033737, FBGN0014877, FBGN0031090, FBGN0013750, FBGN0002121, FBGN0016701, FBGN0029943, FBGN0038065, FBGN0014010	231	285	7937	2.29062	0.902873	0.105093	2.52063
GOTERM_BP_FAT	GO:0012501~programmed cell death	13	3.29114	0.00157843	FBGN0000014, FBGN0011704, FBGN0028406, FBGN0000463, FBGN0000567, FBGN0035107, FBGN0002121, FBGN0020386, FBGN0029943, FBGN0016984, FBGN0033051, FBGN0031392, FBGN0026379	231	153	7937	2.91942	0.909383	0.103397	2.59465
GOTERM_BP_FAT	GO:0009791~post-embryonic development	25	6.32911	0.00167642	FBGN0003162, FBGN0003716, FBGN0011225, FBGN0011205, FBGN0011300, FBGN0004648, FBGN0000463, FBGN0002413, FBGN0042641, FBGN0010303, FBGN0002121, FBGN0001987, FBGN0016984, FBGN0002643, FBGN0026379, FBGN0004390, FBGN0026252, FBGN0035107, FBGN0003302, FBGN0021818, FBGN0000567, FBGN0029944, FBGN0030343, FBGN0029943, FBGN0030486	231	434	7937	1.97922	0.921941	0.104956	2.75361
GOTERM_BP_FAT	GO:0045927~positive regulation of growth	6	1.51899	0.00179513	FBGN0020622, FBGN0003716, FBGN0002413, FBGN0020386, FBGN0010315, FBGN0011300	231	31	7937	6.65019	0.93485	0.107558	2.94588
GOTERM_BP_FAT	GO:0007552~metamorphosis	22	5.56962	0.00182983	FBGN0004390, FBGN0026252, FBGN0003716, FBGN0011225, FBGN0035107, FBGN0011205, FBGN0011300, FBGN0003302, FBGN0004648, FBGN0021818, FBGN0000463, FBGN0000567, FBGN0002413, FBGN0042641, FBGN0010303, FBGN0002121, FBGN0029944, FBGN0029943, FBGN0001987, FBGN0016984, FBGN0002643, FBGN0026379	231	362	7937	2.08813	0.938202	0.105379	3.002
GOTERM_BP_FAT	GO:0008360~regulation of cell shape	10	2.53165	0.00206335	FBGN0025455, FBGN0020440, FBGN0039532, FBGN0000384, FBGN0002121, FBGN0029944, FBGN0000719, FBGN0003041, FBGN0041781, FBGN0026379	231	98	7937	3.50605	0.956697	0.113746	3.37897
GOTERM_BP_FAT	GO:0002165~instar larval or pupal development	24	6.07595	0.00227313	FBGN0004390, FBGN0026252, FBGN0003162, FBGN0003716, FBGN0011225, FBGN0035107, FBGN0011205, FBGN0011300, FBGN0003302, FBGN0004648, FBGN0021818, FBGN0000463, FBGN0000567, FBGN0002413, FBGN0042641, FBGN0010303, FBGN0002121, FBGN0029944, FBGN0029943, FBGN0001987, FBGN0016984, FBGN0002643, FBGN0030486, FBGN0026379	231	418	7937	1.97278	0.968542	0.120248	3.71643
GOTERM_BP_FAT	GO:0022604~regulation of cell morphogenesis	11	2.78481	0.00230825	FBGN0025455, FBGN0020440, FBGN0039532, FBGN0000384, FBGN0002121, FBGN0029944, FBGN0026375, FBGN0000719, FBGN0003041, FBGN0041781, FBGN0026379	231	119	7937	3.17607	0.970181	0.1179	3.77281
GOTERM_BP_FAT	GO:0048707~instar larval or pupal morphogenesis	21	5.31646	0.00252971	FBGN0004390, FBGN0026252, FBGN0003716, FBGN0011225, FBGN0035107, FBGN0011205, FBGN0011300, FBGN0003302, FBGN0004648, FBGN0021818, FBGN0000463, FBGN0000567, FBGN0002413, FBGN0042641, FBGN0010303, FBGN0002121, FBGN0029944, FBGN0029943, FBGN0001987, FBGN0016984, FBGN0002643	231	347	7937	2.07938	0.978721	0.124325	4.12767
GOTERM_BP_FAT	GO:0008219~cell death	13	3.29114	0.0025577	FBGN0000014, FBGN0011704, FBGN0028406, FBGN0000463, FBGN0000567, FBGN0035107, FBGN0002121, FBGN0020386, FBGN0029943, FBGN0016984, FBGN0033051, FBGN0031392, FBGN0026379	231	162	7937	2.75723	0.97961	0.121691	4.17243
GOTERM_BP_FAT	GO:0016265~death	13	3.29114	0.00269183	FBGN0000014, FBGN0011704, FBGN0028406, FBGN0000463, FBGN0000567, FBGN0035107, FBGN0002121, FBGN0020386, FBGN0029943, FBGN0016984, FBGN0033051, FBGN0031392, FBGN0026379	231	163	7937	2.74031	0.983379	0.123803	4.38665
GOTERM_BP_FAT	GO:0030036~actin cytoskeleton organization	12	3.03797	0.00285621	FBGN0025455, FBGN0000463, FBGN0039532, FBGN0035533, FBGN0010303, FBGN0011225, FBGN0002121, FBGN0020386, FBGN0003041, FBGN0016984, FBGN0041781, FBGN0026379	231	143	7937	2.8833	0.987063	0.127039	4.64858
GOTERM_BP_FAT	GO:0009880~embryonic pattern specification	16	4.05063	0.00288736	FBGN0004390, FBGN0003042, FBGN0003162, FBGN0021818, FBGN0001180, FBGN0003015, FBGN0000014, FBGN0004838, FBGN0000463, FBGN0042641, FBGN0002121, FBGN0000166, FBGN0000251, FBGN0000719, FBGN0003117, FBGN0002962	231	231	7937	2.37987	0.987663	0.124698	4.69815
GOTERM_BP_FAT	GO:0040008~regulation of growth	10	2.53165	0.00290504	FBGN0020622, FBGN0003716, FBGN0002413, FBGN0027594, FBGN0020386, FBGN0010315, FBGN0011300, FBGN0036007, FBGN0038197, FBGN0026379	231	103	7937	3.33586	0.987991	0.121958	4.72626
GOTERM_BP_FAT	GO:0045165~cell fate commitment	16	4.05063	0.00297127	FBGN0026252, FBGN0003716, FBGN0000404, FBGN0011225, FBGN0001180, FBGN0003015, FBGN0004837, FBGN0000014, FBGN0000463, FBGN0002121, FBGN0000077, FBGN0000163, FBGN0003117, FBGN0002962, FBGN0002643, FBGN0026379	231	232	7937	2.36961	0.989144	0.121228	4.83152
GOTERM_BP_FAT	GO:0030029~actin filament-based process	12	3.03797	0.00301538	FBGN0025455, FBGN0000463, FBGN0039532, FBGN0035533, FBGN0010303, FBGN0011225, FBGN0002121, FBGN0020386, FBGN0003041, FBGN0016984, FBGN0041781, FBGN0026379	231	144	7937	2.86328	0.98985	0.119714	4.90157
GOTERM_BP_FAT	GO:0035220~wing disc development	18	4.55696	0.0032103	FBGN0004390, FBGN0026252, FBGN0003716, FBGN0027594, FBGN0029905, FBGN0010651, FBGN0011205, FBGN0011300, FBGN0004648, FBGN0021818, FBGN0004837, FBGN0000463, FBGN0002413, FBGN0042641, FBGN0029944, FBGN0001987, FBGN0002643, FBGN0030486	231	281	7937	2.20095	0.99246	0.123742	5.21052
GOTERM_BP_FAT	GO:0007049~cell cycle	31	7.8481	0.00326133	FBGN0016694, FBGN0003042, FBGN0000404, FBGN0003162, FBGN0032987, FBGN0000405, FBGN0011225, FBGN0011205, FBGN0003041, FBGN0028662, FBGN0002121, FBGN0001987, FBGN0041781, FBGN0004390, FBGN0037632, FBGN0010317, FBGN0023213, FBGN0003525, FBGN0010315, FBGN0011573, FBGN0003302, FBGN0026250, FBGN0011761, FBGN0025455, FBGN0013750, FBGN0002638, FBGN0038197, FBGN0014010, FBGN0000163, FBGN0002962, FBGN00157…	231	616	7937	1.72912	0.993024	0.12249	5.29125
GOTERM_BP_FAT	GO:0000278~mitotic cell cycle	21	5.31646	0.00363672	FBGN0016694, FBGN0004390, FBGN0003042, FBGN0000404, FBGN0003162, FBGN0032987, FBGN0000405, FBGN0011225, FBGN0037632, FBGN0010317, FBGN0003525, FBGN0023213, FBGN0011205, FBGN0003302, FBGN0011573, FBGN0026250, FBGN0028662, FBGN0002638, FBGN0000163, FBGN0014010, FBGN0015756	231	358	7937	2.01549	0.996065	0.132376	5.88309
GOTERM_BP_FAT	GO:0009952~anterior/posterior pattern formation	13	3.29114	0.00379954	FBGN0004390, FBGN0003716, FBGN0021818, FBGN0001180, FBGN0003015, FBGN0000014, FBGN0000463, FBGN0004838, FBGN0000166, FBGN0002121, FBGN0000719, FBGN0000251, FBGN0002962	231	170	7937	2.62748	0.996931	0.134681	6.13872
GOTERM_BP_FAT	GO:0007350~blastoderm segmentation	15	3.79747	0.00431816	FBGN0004390, FBGN0003042, FBGN0021818, FBGN0001180, FBGN0003015, FBGN0000014, FBGN0004838, FBGN0000463, FBGN0042641, FBGN0002121, FBGN0000166, FBGN0000251, FBGN0000719, FBGN0003117, FBGN0002962	231	218	7937	2.36417	0.998609	0.148226	6.94862
GOTERM_BP_FAT	GO:0040007~growth	10	2.53165	0.00451546	FBGN0032475, FBGN0016694, FBGN0039532, FBGN0002413, FBGN0010303, FBGN0003301, FBGN0029944, FBGN0010315, FBGN0036007, FBGN0023388	231	110	7937	3.12357	0.998971	0.151077	7.255
GOTERM_BP_FAT	GO:0015781~pyrimidine nucleotide-sugar transport	3	0.759494	0.00482699	FBGN0029849, FBGN0042641, FBGN0024994	231	4	7937	25.7695	0.99936	0.157214	7.73684
GOTERM_BP_FAT	GO:0002009~morphogenesis of an epithelium	15	3.79747	0.00569902	FBGN0026252, FBGN0003716, FBGN0039532, FBGN0000384, FBGN0011225, FBGN0038755, FBGN0000463, FBGN0002413, FBGN0010303, FBGN0027660, FBGN0002121, FBGN0029944, FBGN0000719, FBGN0000163, FBGN0003117	231	225	7937	2.29062	0.999831	0.179169	9.0731
GOTERM_BP_FAT	GO:0021700~developmental maturation	11	2.78481	0.00572113	FBGN0003042, FBGN0000463, FBGN0004838, FBGN0002121, FBGN0038524, FBGN0000533, FBGN0030343, FBGN0000163, FBGN0016984, FBGN0003015, FBGN0002962	231	135	7937	2.79965	0.999837	0.176179	9.10674
GOTERM_BP_FAT	GO:0042127~regulation of cell proliferation	7	1.77215	0.00585982	FBGN0020622, FBGN0028397, FBGN0002121, FBGN0014010, FBGN0038197, FBGN0023388, FBGN0026379	231	57	7937	4.21956	0.999868	0.176506	9.31751
GOTERM_BP_FAT	GO:0032870~cellular response to hormone stimulus	5	1.26582	0.0062188	FBGN0020622, FBGN0020386, FBGN0038197, FBGN0030486, FBGN0026379	231	26	7937	6.60756	0.999924	0.182698	9.86092
GOTERM_BP_FAT	GO:0007447~imaginal disc pattern formation	9	2.27848	0.00652725	FBGN0000014, FBGN0004837, FBGN0000463, FBGN0003716, FBGN0042641, FBGN0027594, FBGN0010651, FBGN0029905, FBGN0000251	231	96	7937	3.22119	0.999952	0.187284	10.3254
GOTERM_BP_FAT	GO:0015031~protein transport	17	4.3038	0.00675186	FBGN0013749, FBGN0026252, FBGN0033984, FBGN0031534, FBGN0002566, FBGN0024889, FBGN0000119, FBGN0015791, FBGN0004868, FBGN0033737, FBGN0014877, FBGN0031090, FBGN0013750, FBGN0016701, FBGN0029943, FBGN0038065, FBGN0014010	231	278	7937	2.10111	0.999966	0.189542	10.6622
GOTERM_BP_FAT	GO:0045448~mitotic cell cycle, embryonic	5	1.26582	0.00713734	FBGN0003042, FBGN0000404, FBGN0003162, FBGN0000405, FBGN0010317	231	27	7937	6.36283	0.999981	0.195676	11.2374
GOTERM_BP_FAT	GO:0009719~response to endogenous stimulus	6	1.51899	0.00767727	FBGN0020622, FBGN0002121, FBGN0020386, FBGN0038197, FBGN0030486, FBGN0026379	231	43	7937	4.79432	0.999992	0.205225	12.0374
GOTERM_BP_FAT	GO:0009725~response to hormone stimulus	6	1.51899	0.00767727	FBGN0020622, FBGN0002121, FBGN0020386, FBGN0038197, FBGN0030486, FBGN0026379	231	43	7937	4.79432	0.999992	0.205225	12.0374
GOTERM_BP_FAT	GO:0048870~cell motility	13	3.29114	0.00804734	FBGN0039532, FBGN0033846, FBGN0011225, FBGN0003041, FBGN0001180, FBGN0000014, FBGN0004838, FBGN0000463, FBGN0010303, FBGN0000182, FBGN0014010, FBGN0000163, FBGN0002962	231	187	7937	2.38861	0.999995	0.210363	12.5817
GOTERM_BP_FAT	GO:0010604~positive regulation of macromolecule metabolic process	11	2.78481	0.00810088	FBGN0004837, FBGN0016694, FBGN0033166, FBGN0004838, FBGN0037555, FBGN0000166, FBGN0000251, FBGN0003117, FBGN0003015, FBGN0001180, FBGN0002643	231	142	7937	2.66164	0.999996	0.208063	12.6602
GOTERM_BP_FAT	GO:0007560~imaginal disc morphogenesis	17	4.3038	0.00823723	FBGN0004390, FBGN0026252, FBGN0003716, FBGN0011225, FBGN0011205, FBGN0011300, FBGN0003302, FBGN0004648, FBGN0021818, FBGN0000463, FBGN0002413, FBGN0042641, FBGN0010303, FBGN0002121, FBGN0029944, FBGN0001987, FBGN0002643	231	284	7937	2.05672	0.999997	0.207706	12.8598
GOTERM_BP_FAT	GO:0048563~post-embryonic organ morphogenesis	17	4.3038	0.00823723	FBGN0004390, FBGN0026252, FBGN0003716, FBGN0011225, FBGN0011205, FBGN0011300, FBGN0003302, FBGN0004648, FBGN0021818, FBGN0000463, FBGN0002413, FBGN0042641, FBGN0010303, FBGN0002121, FBGN0029944, FBGN0001987, FBGN0002643	231	284	7937	2.05672	0.999997	0.207706	12.8598
GOTERM_BP_FAT	GO:0033301~cell cycle comprising mitosis without cytokinesis	4	1.01266	0.00844362	FBGN0003042, FBGN0000404, FBGN0003162, FBGN0000405	231	15	7937	9.16248	0.999997	0.208909	13.1611
GOTERM_BP_FAT	GO:0008285~negative regulation of cell proliferation	5	1.26582	0.00923332	FBGN0028397, FBGN0002121, FBGN0014010, FBGN0038197, FBGN0026379	231	29	7937	5.92402	0.999999	0.222586	14.3049
GOTERM_BP_FAT	GO:0009948~anterior/posterior axis specification	11	2.78481	0.010222	FBGN0004390, FBGN0000463, FBGN0004838, FBGN0002121, FBGN0000166, FBGN0000251, FBGN0000719, FBGN0003015, FBGN0002962, FBGN0001180, FBGN0021818	231	147	7937	2.5711	1	0.239661	15.717
GOTERM_BP_FAT	GO:0010608~posttranscriptional regulation of gene expression	10	2.53165	0.0107684	FBGN0016070, FBGN0004838, FBGN0032725, FBGN0000166, FBGN0000182, FBGN0036534, FBGN0011837, FBGN0003015, FBGN0002962, FBGN0026379	231	126	7937	2.72693	1	0.247036	16.488

## Sheet: C) Adult; Pum motif
Category	Term	Count	%	PValue	Genes	List Total	Pop Hits	Pop Total	Fold Enrichment	Bonferroni	Benjamini	FDR
GOTERM_BP_FAT	GO:0051094~positive regulation of developmental process	4	3.2	0.0014222	FBGN0000014, FBGN0004390, FBGN0003716, FBGN0023388	76	24	7937	17.4057	0.694419	0.694419	2.1723
GOTERM_BP_FAT	GO:0007167~enzyme linked receptor protein signaling pathway	7	5.6	0.00239656	FBGN0004390, FBGN0003716, FBGN0020386, FBGN0038755, FBGN0011573, FBGN0001180, FBGN0026379	76	145	7937	5.04165	0.864493	0.631888	3.635
GOTERM_BP_FAT	GO:0010324~membrane invagination	9	7.2	0.00286874	FBGN0013749, FBGN0031090, FBGN0013750, FBGN0016701, FBGN0038065, FBGN0023388, FBGN0037473, FBGN0037093, FBGN0041781	76	258	7937	3.64305	0.908653	0.549636	4.33644
GOTERM_BP_FAT	GO:0006897~endocytosis	9	7.2	0.00286874	FBGN0013749, FBGN0031090, FBGN0013750, FBGN0016701, FBGN0038065, FBGN0023388, FBGN0037473, FBGN0037093, FBGN0041781	76	258	7937	3.64305	0.908653	0.549636	4.33644
GOTERM_BP_FAT	GO:0051301~cell division	8	6.4	0.00310749	FBGN0000463, FBGN0003716, FBGN0031090, FBGN0013750, FBGN0010315, FBGN0011573, FBGN0000163, FBGN0037473	76	205	7937	4.07548	0.925173	0.476984	4.6893
GOTERM_BP_FAT	GO:0012501~programmed cell death	7	5.6	0.00313464	FBGN0000014, FBGN0000463, FBGN0000567, FBGN0020386, FBGN0029943, FBGN0033051, FBGN0026379	76	153	7937	4.77804	0.926851	0.40729	4.72933
GOTERM_BP_FAT	GO:0007169~transmembrane receptor protein tyrosine kinase signaling pathway	6	4.8	0.00358648	FBGN0004390, FBGN0020386, FBGN0038755, FBGN0011573, FBGN0001180, FBGN0026379	76	109	7937	5.74867	0.949859	0.392752	5.39354
GOTERM_BP_FAT	GO:0008219~cell death	7	5.6	0.00415532	FBGN0000014, FBGN0000463, FBGN0000567, FBGN0020386, FBGN0029943, FBGN0033051, FBGN0026379	76	162	7937	4.51259	0.968839	0.390742	6.22356
GOTERM_BP_FAT	GO:0016265~death	7	5.6	0.0042823	FBGN0000014, FBGN0000463, FBGN0000567, FBGN0020386, FBGN0029943, FBGN0033051, FBGN0026379	76	163	7937	4.4849	0.971979	0.360362	6.40792
GOTERM_BP_FAT	GO:0007276~gamete generation	15	12	0.00641745	FBGN0001941, FBGN0003742, FBGN0003716, FBGN0033846, FBGN0020386, FBGN0000014, FBGN0000463, FBGN0000018, FBGN0000567, FBGN0013750, FBGN0000533, FBGN0000163, FBGN0033748, FBGN0041781, FBGN0033749	76	715	7937	2.19093	0.995313	0.448925	9.45746
GOTERM_BP_FAT	GO:0019953~sexual reproduction	15	12	0.00814305	FBGN0001941, FBGN0003742, FBGN0003716, FBGN0033846, FBGN0020386, FBGN0000014, FBGN0000463, FBGN0000018, FBGN0000567, FBGN0013750, FBGN0000533, FBGN0000163, FBGN0033748, FBGN0041781, FBGN0033749	76	735	7937	2.13131	0.998898	0.493936	11.8539

## Sheet: D) Adult; Both motifs
None with P = || < 0.01

## Sheet: E) Embryo; Nos-Pum motif
Category	Term	Count	%	PValue	Genes	List Total	Pop Hits	Pop Total	Fold Enrichment	Bonferroni	Benjamini	FDR
GOTERM_BP_FAT	GO:0007281~germ cell development	11	11.4583	8.61194e-06	FBGN0004872, FBGN0004882, FBGN0026404, FBGN0026619, FBGN0003023, FBGN0000158, FBGN0000808, FBGN0003495, FBGN0000615, FBGN0003015, FBGN0002962	59	243	7937	6.08963	0.00475967	0.00475967	0.0125795
GOTERM_BP_FAT	GO:0048610~reproductive cellular process	15	15.625	9.99479e-06	FBGN0004872, FBGN0003114, FBGN0004882, FBGN0003023, FBGN0026619, FBGN0003480, FBGN0000158, FBGN0004649, FBGN0003495, FBGN0000615, FBGN0003015, FBGN0026404, FBGN0000808, FBGN0002962, FBGN0002673	59	500	7937	4.03576	0.00552184	0.00276474	0.0145994
GOTERM_BP_FAT	GO:0003006~reproductive developmental process	13	13.5417	0.000237089	FBGN0004872, FBGN0004882, FBGN0003023, FBGN0026619, FBGN0000158, FBGN0003480, FBGN0003495, FBGN0000615, FBGN0003015, FBGN0026404, FBGN0000808, FBGN0002962, FBGN0002673	59	506	7937	3.45619	0.123101	0.0428429	0.345781
GOTERM_BP_FAT	GO:0001709~cell fate determination	7	7.29167	0.000332351	FBGN0004872, FBGN0004882, FBGN0003480, FBGN0000158, FBGN0000077, FBGN0003015, FBGN0002962	59	129	7937	7.29983	0.168191	0.0449946	0.4844
GOTERM_BP_FAT	GO:0048134~germ-line cyst formation	4	4.16667	0.000448617	FBGN0004882, FBGN0003023, FBGN0000158, FBGN0002962	59	21	7937	25.6239	0.2201	0.0485022	0.653341
GOTERM_BP_FAT	GO:0009994~oocyte differentiation	7	7.29167	0.000477249	FBGN0004882, FBGN0003480, FBGN0000808, FBGN0003495, FBGN0000615, FBGN0003015, FBGN0002962	59	138	7937	6.82375	0.232379	0.0431192	0.694904
GOTERM_BP_FAT	GO:0009798~axis specification	8	8.33333	0.0006054	FBGN0004882, FBGN0003480, FBGN0000808, FBGN0000251, FBGN0003495, FBGN0000615, FBGN0003015, FBGN0002962	59	201	7937	5.35425	0.285015	0.0467972	0.880732
GOTERM_BP_FAT	GO:0019953~sexual reproduction	15	15.625	0.000642428	FBGN0004872, FBGN0003114, FBGN0004882, FBGN0003023, FBGN0026619, FBGN0003480, FBGN0000158, FBGN0004649, FBGN0003495, FBGN0000615, FBGN0003015, FBGN0026404, FBGN0000808, FBGN0002962, FBGN0002673	59	735	7937	2.74542	0.299541	0.0435267	0.934365
GOTERM_BP_FAT	GO:0007283~spermatogenesis	7	7.29167	0.000881618	FBGN0004872, FBGN0026404, FBGN0026619, FBGN0000158, FBGN0000615, FBGN0002962, FBGN0002673	59	155	7937	6.07534	0.386535	0.0528449	1.28017
GOTERM_BP_FAT	GO:0048232~male gamete generation	7	7.29167	0.000881618	FBGN0004872, FBGN0026404, FBGN0026619, FBGN0000158, FBGN0000615, FBGN0002962, FBGN0002673	59	155	7937	6.07534	0.386535	0.0528449	1.28017
GOTERM_BP_FAT	GO:0044265~cellular macromolecule catabolic process	8	8.33333	0.0011775	FBGN0016070, FBGN0038627, FBGN0015321, FBGN0036332, FBGN0024732, FBGN0034187, FBGN0010590, FBGN0031896	59	225	7937	4.78313	0.479373	0.0631876	1.70638
GOTERM_BP_FAT	GO:0007276~gamete generation	14	14.5833	0.0016027	FBGN0004872, FBGN0004882, FBGN0003023, FBGN0026619, FBGN0000158, FBGN0003480, FBGN0004649, FBGN0003495, FBGN0000615, FBGN0003015, FBGN0026404, FBGN0000808, FBGN0002962, FBGN0002673	59	715	7937	2.63406	0.588771	0.0776056	2.31585
GOTERM_BP_FAT	GO:0007309~oocyte axis specification	6	6.25	0.00163074	FBGN0004882, FBGN0000808, FBGN0003495, FBGN0000615, FBGN0003015, FBGN0002962	59	118	7937	6.84028	0.595121	0.0725786	2.35592
GOTERM_BP_FAT	GO:0007308~oocyte construction	6	6.25	0.00182229	FBGN0004882, FBGN0000808, FBGN0003495, FBGN0000615, FBGN0003015, FBGN0002962	59	121	7937	6.67068	0.635952	0.0747844	2.62924
GOTERM_BP_FAT	GO:0006417~regulation of translation	5	5.20833	0.00182531	FBGN0016070, FBGN0004882, FBGN0003480, FBGN0003015, FBGN0002962	59	72	7937	9.34204	0.636561	0.0697445	2.63354
GOTERM_BP_FAT	GO:0010608~posttranscriptional regulation of gene expression	6	6.25	0.00217759	FBGN0016070, FBGN0004872, FBGN0004882, FBGN0003480, FBGN0003015, FBGN0002962	59	126	7937	6.40597	0.701115	0.0773572	3.13431
GOTERM_BP_FAT	GO:0048599~oocyte development	6	6.25	0.00217759	FBGN0004882, FBGN0000808, FBGN0003495, FBGN0000615, FBGN0003015, FBGN0002962	59	126	7937	6.40597	0.701115	0.0773572	3.13431
GOTERM_BP_FAT	GO:0048469~cell maturation	6	6.25	0.002333	FBGN0004882, FBGN0000808, FBGN0003495, FBGN0000615, FBGN0003015, FBGN0002962	59	128	7937	6.30588	0.725825	0.0776904	3.35446
GOTERM_BP_FAT	GO:0032268~regulation of cellular protein metabolic process	6	6.25	0.00249635	FBGN0016070, FBGN0004882, FBGN0003480, FBGN0023216, FBGN0003015, FBGN0002962	59	130	7937	6.20887	0.749604	0.0782244	3.58537
GOTERM_BP_FAT	GO:0021700~developmental maturation	6	6.25	0.00294107	FBGN0004882, FBGN0000808, FBGN0003495, FBGN0000615, FBGN0003015, FBGN0002962	59	135	7937	5.97891	0.804414	0.0866654	4.21138
GOTERM_BP_FAT	GO:0051327~M phase of meiotic cell cycle	7	7.29167	0.00323169	FBGN0011761, FBGN0002901, FBGN0003480, FBGN0000158, FBGN0040347, FBGN0002962, FBGN0002673	59	200	7937	4.70839	0.833583	0.0900648	4.61843
GOTERM_BP_FAT	GO:0007126~meiosis	7	7.29167	0.00323169	FBGN0011761, FBGN0002901, FBGN0003480, FBGN0000158, FBGN0040347, FBGN0002962, FBGN0002673	59	200	7937	4.70839	0.833583	0.0900648	4.61843
GOTERM_BP_FAT	GO:0032504~multicellular organism reproduction	14	14.5833	0.0034036	FBGN0004872, FBGN0004882, FBGN0003023, FBGN0026619, FBGN0000158, FBGN0003480, FBGN0004649, FBGN0003495, FBGN0000615, FBGN0003015, FBGN0026404, FBGN0000808, FBGN0002962, FBGN0002673	59	778	7937	2.42077	0.848749	0.0901182	4.85846
GOTERM_BP_FAT	GO:0048609~reproductive process in a multicellular organism	14	14.5833	0.0034036	FBGN0004872, FBGN0004882, FBGN0003023, FBGN0026619, FBGN0000158, FBGN0003480, FBGN0004649, FBGN0003495, FBGN0000615, FBGN0003015, FBGN0026404, FBGN0000808, FBGN0002962, FBGN0002673	59	778	7937	2.42077	0.848749	0.0901182	4.85846
GOTERM_BP_FAT	GO:0009057~macromolecule catabolic process	8	8.33333	0.0038297	FBGN0016070, FBGN0038627, FBGN0015321, FBGN0036332, FBGN0024732, FBGN0034187, FBGN0010590, FBGN0031896	59	277	7937	3.88521	0.880654	0.0962704	5.45095
GOTERM_BP_FAT	GO:0051321~meiotic cell cycle	7	7.29167	0.00420621	FBGN0011761, FBGN0002901, FBGN0003480, FBGN0000158, FBGN0040347, FBGN0002962, FBGN0002673	59	211	7937	4.46293	0.903204	0.100704	5.97163
GOTERM_BP_FAT	GO:0007127~meiosis I	4	4.16667	0.00422752	FBGN0002901, FBGN0003480, FBGN0040347, FBGN0002673	59	45	7937	11.9578	0.904345	0.0970101	6.00103
GOTERM_BP_FAT	GO:0009948~anterior/posterior axis specification	6	6.25	0.00423919	FBGN0004882, FBGN0003480, FBGN0000251, FBGN0000615, FBGN0003015, FBGN0002962	59	147	7937	5.49083	0.904964	0.0934079	6.01712
GOTERM_BP_FAT	GO:0048477~oogenesis	11	11.4583	0.00518021	FBGN0004872, FBGN0004882, FBGN0003023, FBGN0003480, FBGN0000158, FBGN0000808, FBGN0004649, FBGN0003495, FBGN0000615, FBGN0003015, FBGN0002962	59	539	7937	2.74542	0.943713	0.108716	7.30624
GOTERM_BP_FAT	GO:0007349~cellularization	5	5.20833	0.00537111	FBGN0004872, FBGN0026404, FBGN0026619, FBGN0003015, FBGN0002673	59	97	7937	6.9343	0.949391	0.108415	7.56574
GOTERM_BP_FAT	GO:0007292~female gamete generation	11	11.4583	0.00567007	FBGN0004872, FBGN0004882, FBGN0003023, FBGN0003480, FBGN0000158, FBGN0000808, FBGN0004649, FBGN0003495, FBGN0000615, FBGN0003015, FBGN0002962	59	546	7937	2.71022	0.957155	0.110123	7.97076
GOTERM_BP_FAT	GO:0045165~cell fate commitment	7	7.29167	0.00665081	FBGN0004872, FBGN0004882, FBGN0003480, FBGN0000158, FBGN0000077, FBGN0003015, FBGN0002962	59	232	7937	4.05896	0.975199	0.123686	9.28789
GOTERM_BP_FAT	GO:0051052~regulation of DNA metabolic process	3	3.125	0.00744885	FBGN0004872, FBGN0003114, FBGN0003023	59	18	7937	22.4209	0.984111	0.1331	10.3467
GOTERM_BP_FAT	GO:0009952~anterior/posterior pattern formation	6	6.25	0.00779578	FBGN0004882, FBGN0003480, FBGN0000251, FBGN0000615, FBGN0003015, FBGN0002962	59	170	7937	4.74796	0.986908	0.134568	10.8034
GOTERM_BP_FAT	GO:0007143~female meiosis	4	4.16667	0.0107846	FBGN0011761, FBGN0002901, FBGN0002962, FBGN0002673	59	63	7937	8.5413	0.997539	0.17616	14.6489

## Sheet: F) Embryo; Pum motif
None with P = || < 0.01

## Sheet: G) Embryo; Both motif
None with P = || < 0.01
