# Supplementary material for: Drosophila Nanos acts as a molecular clamp that modulates the RNA-binding and repression activities of Pumilio
Source: eLife. 2016 Aug 2;5:e17096. doi: 10.7554/eLife.17096 (PMC4995099; doi:10.7554/eLife.17096)
Supplement: Figure 8—source data 1. — The average value of the relative response ratio of Renilla to Firefly luciferase activities (Rn/FF), average percent repression values (%Repress), and Standard Errors of the Mean (SEM) are listed for each condition in the experiments (from 4 technical replicates, n = 4). The p-values (p-val) resulting from two-tailed t-tests between each measurement and the indicated control are represented in bold (significant) or italics (not significant). Experimental values derived from the same experiment are outlined in boxes. DOI: http://dx.doi.org/10.7554/eLife.17096.032 [file elife-17096-fig8-data1.xlsx]

## Sheet: Sheet1
Figure 8 - Source Data. Values and statistical analysis of luciferase reporter assays. The average value of the relative response ratio of Renilla to Firefly luciferase activities (Rn/FF), average percent repression values (%Repress), and Standard Errors of the Mean (SEM) are listed for each condition in the experiments (from 4 technical replicates, n = 4). The p-values (p-val) resulting from two…
Figure 8C
UTR	Protein	avg Rn/FF	%Repress	SEM	0ng p-val	ACA p-val
hb NRE2	0ng Halo	0.113456	-2.66454e-15	2.06664
hb NRE2	1ng Halo	0.112814	0.565765	2.46513	0.8582	0.2317
hb NRE2	10ng Halo	0.11235	0.974636	1.10927	0.6848	0.0145
hb NRE2	100ng Halo	0.109249	3.70797	1.19144	0.1719	0.0001
hb NRE2	200ng Halo	0.11685	-2.991	1.00987	0.2400	<0.0001
hb NRE2	0ng NZC	0.110471	8.21565e-15	2.00129
hb NRE2	1ng NZC	0.097249	11.969	1.87445	0.0047	0.0003
hb NRE2	10ng NZC	0.061186	44.6133	0.659808	<0.0001	<0.0001
hb NRE2	100ng NZC	0.038615	65.0451	0.412128	<0.0001	<0.0001
hb NRE2	200ng NZC	0.0352718	68.0715	0.253715	<0.0001	<0.0001
hb NRE1	0ng NZC	0.273355	-8.32667e-15	0.329544
hb NRE1	1ng NZC	0.206813	24.3428	1.27864	<0.0001	<0.0001
hb NRE1	10ng NZC	0.12562	54.0451	0.405905	<0.0001	<0.0001
hb NRE1	100ng NZC	0.0801731	70.6707	0.3748	<0.0001	<0.0001
hb NRE1	200ng NZC	0.0740768	72.9009	0.41792	<0.0001	<0.0001
hb NRE2 ACA	0ng NZC	0.257387	5.55112e-15	0.51183
hb NRE2 ACA	1ng NZC	0.264658	-2.8246	0.673448	0.0162
hb NRE2 ACA	10ng NZC	0.267332	-3.86363	1.01872	0.0141
hb NRE2 ACA	100ng NZC	0.218722	15.0224	0.606357	<0.0001
hb NRE2 ACA	200ng NZC	0.18963	26.3252	0.386627	<0.0001
bcd NRE	0ng NZC	0.193377	-5.55112e-15	1.41304
bcd NRE	1ng NZC	0.179577	7.13605	1.23153	0.0091	0.0004
bcd NRE	10ng NZC	0.137871	28.7032	1.74767	<0.0001	<0.0001
bcd NRE	100ng NZC	0.082945	57.1071	0.304259	<0.0001	<0.0001
bcd NRE	200ng NZC	0.0732518	62.1197	0.49066	<0.0001	<0.0001
CycB NRE	0ng NZC	0.24346	2.88658e-15	2.32399
CycB NRE	1ng NZC	0.242237	0.502213	2.03188	0.8766	0.1741
CycB NRE	10ng NZC	0.227954	6.36908	0.383507	0.0348	<0.0001
CycB NRE	100ng NZC	0.184573	24.1874	0.127376	<0.0001	<0.0001
CycB NRE	200ng NZC	0.169608	30.3345	0.581722	<0.0001	0.0012
MCS	0ng NZC	0.168829	0	2.22408
MCS	1ng NZC	0.172057	-1.91188	2.16012	0.5625	0.7045
MCS	10ng NZC	0.170167	-0.792286	2.54425	0.8207	0.3012
MCS	100ng NZC	0.137765	18.3996	4.73164	0.0125	0.5028
MCS	200ng NZC	0.132147	21.7274	0.625406	<0.0001	0.0008
hb NRE2 +3G	0ng NZC	0.252203	1.66533e-14	2.31512
hb NRE2 +3G	1ng NZC	0.252249	-0.0184548	1.58386	0.9950	0.1549
hb NRE2 +3G	10ng NZC	0.245891	2.5025	0.581733	0.3353	0.0016
hb NRE2 +3G	100ng NZC	0.200454	20.5186	0.332102	0.0001	0.0002
hb NRE2 +3G	200ng NZC	0.178711	29.14	0.526554	<0.0001	0.0052
Figure 8D
UTR	Protein	avg Rn/FF	%Repress	SEM	0ng p-val	ACA p-val
3x hb NRE2	0ng NZC	1.04802	-2.8e-15	1.15936
3x hb NRE2	10ng NZC	0.227842	78.2597	0.305126	<0.0001	<0.0001
3x hb NRE2	200ng NZC	0.187623	82.0974	0.250594	<0.0001	<0.0001
3x hb NRE2 +3G	0ng NZC	0.917227	1.11e-14	1.65824
3x hb NRE2 +3G	10ng NZC	0.71986	21.5178	1.19919	<0.0001	<0.0001
3x hb NRE2 +3G	200ng NZC	0.418684	54.3533	0.684745	<0.0001	<0.0001
3x CycB NRE	0ng NZC	0.876457	0	0.325227
3x CycB NRE	10ng NZC	0.595919	32.0082	0.250379	<0.0001	<0.0001
3x CycB NRE	200ng NZC	0.305212	65.1766	0.018409	<0.0001	<0.0001
3x hb NRE2 ACA	0ng NZC	0.827247	5.55e-15	0.646001
3x hb NRE2 ACA	10ng NZC	0.831164	-0.47353	0.729497	0.6261
3x hb NRE2 ACA	200ng NZC	0.649764	21.4547	0.142051	<0.0001
